# Supplementary material
Source: Springer Nature journal article supplement (https://www.springermedizin.de/resource/supplementary/12884_2013_1175_MOESM1_ESM.pdf/9459082)
Supplement: MOESM1 [file 9459082]

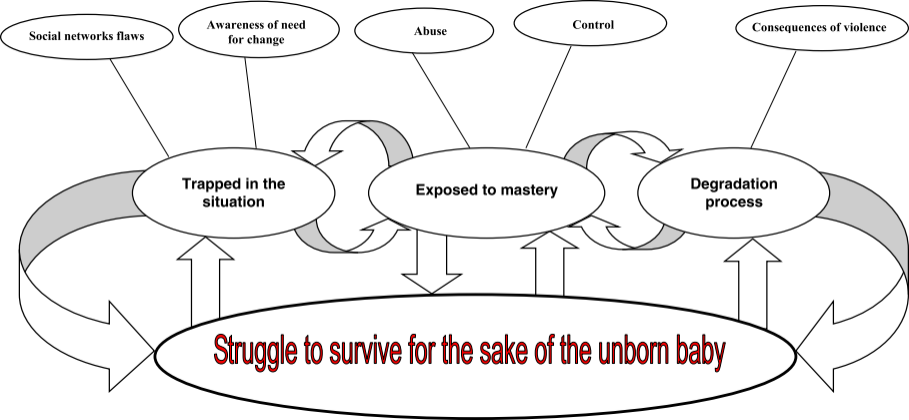

Social networks flaws

Awareness of need for change

Abuse

Control

Consequences of violence

Trapped in the situation

Exposed to mastery

Degradation process

Struggle to survive for the sake of the unborn baby
